# Supplementary material for: Switchable selectivity to electrocatalytic reduction of furfural over Cu2O-derived nanowire arrays
Source: Royal Society of Chemistry journal article supplement (doi:10.1039/d4dt01078g), 2024-01-01
Supplement: d4dt01078g1.pdf [file d4dt01078g1.pdf]

## Switchable selectivity to electrocatalytic reduction of furfural over Cu<sub>2</sub>O-derived nanowire arrays

Li Ma, Huiling Liu\*, and Cheng Wang\*

### Affiliations:

Tianjin Key Laboratory of Advanced Functional Porous Materials and Center for Electron Microscopy, Institute for New Energy Materials & Low-Carbon Technologies, School of Materials Science and Engineering, Tianjin University of Technology, Tianjin 300384, China.

E-mail: [hlliu\\_tjut2016@163.com](mailto:hlliu_tjut2016@163.com); [cwang@tjut.edu.cn](mailto:cwang@tjut.edu.cn)

### Supplementary Results

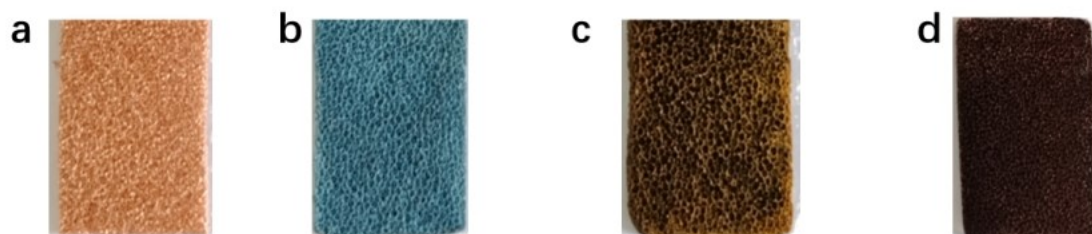

Fig. S1 Digital photographs of (a) Cu foam, (b) Cu(OH)<sub>2</sub> arrays, (c) Cu<sub>2</sub>O arrays and (d) Cu<sub>2</sub>O-D arrays.

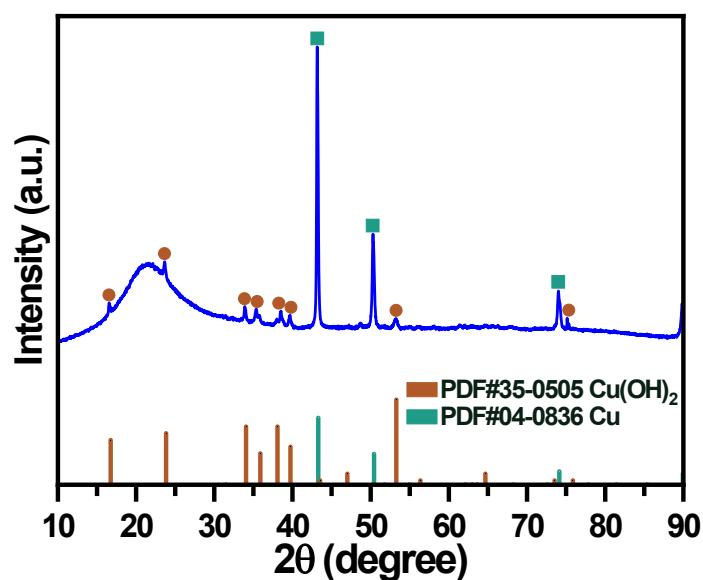

Fig. S2 XRD pattern of the Cu(OH)<sub>2</sub> arrays.

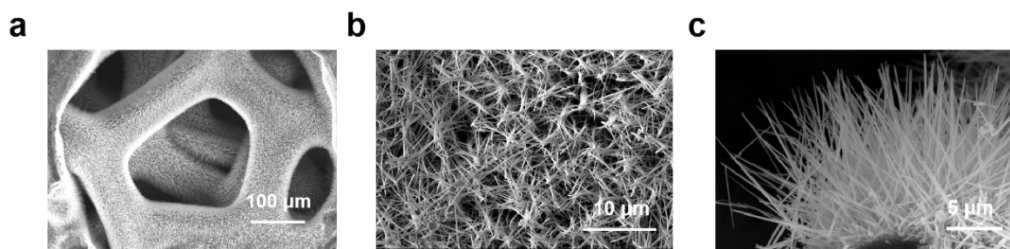

Fig. S3 SEM images of the  $\text{Cu}(\text{OH})_2$  arrays.

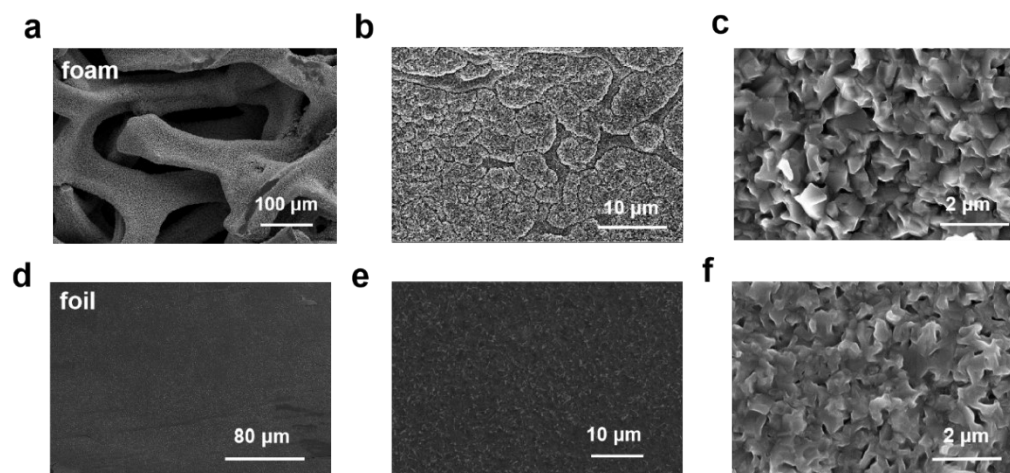

Fig. S4 SEM images of (a-c)  $\text{Cu}_2\text{O}$  foam, and (d-f)  $\text{Cu}_2\text{O}$  foil.

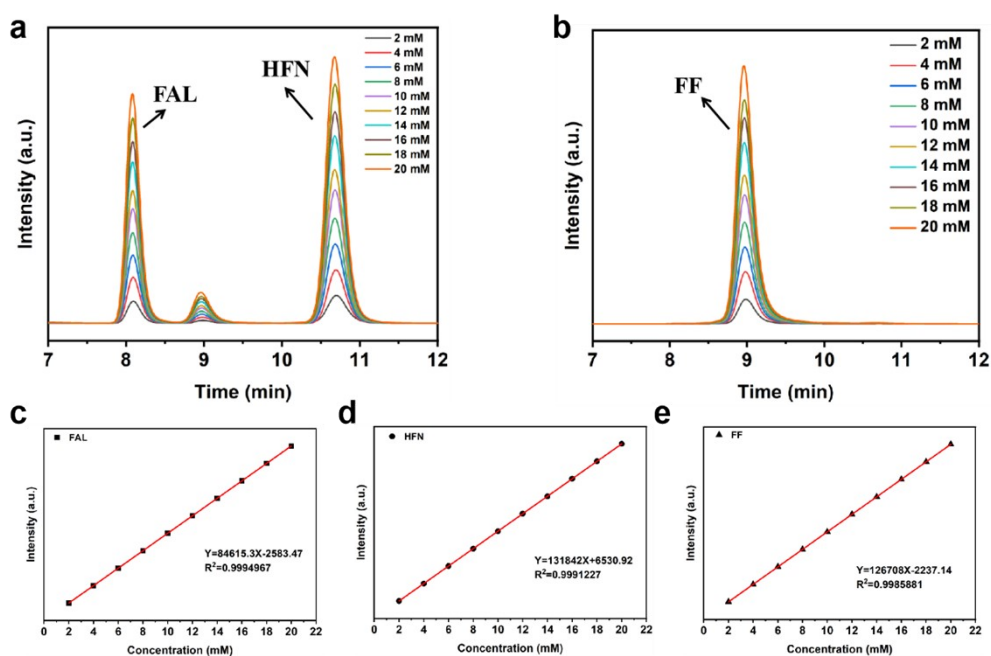

Fig. S5 Reference HPLC spectra for (a) FAL and HFN under UV absorption wavelength of 210 nm and (b) FF under UV absorption wavelength of 265 nm. Calibration curves of (c) FAL, (d) HFN and (e) FF.

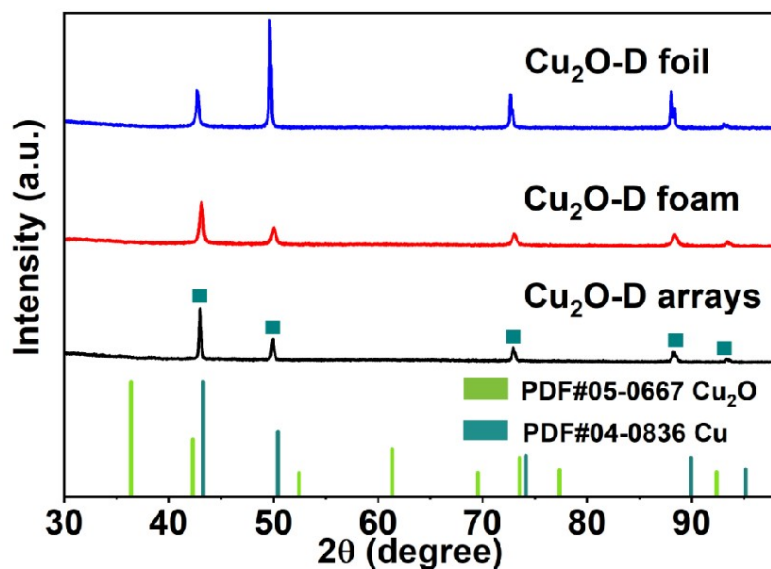

Fig. S6 XRD patterns of the  $\text{Cu}_2\text{O}$ -D arrays,  $\text{Cu}_2\text{O}$ -D foam and  $\text{Cu}_2\text{O}$ -D foil with electrochemical pretreatment.

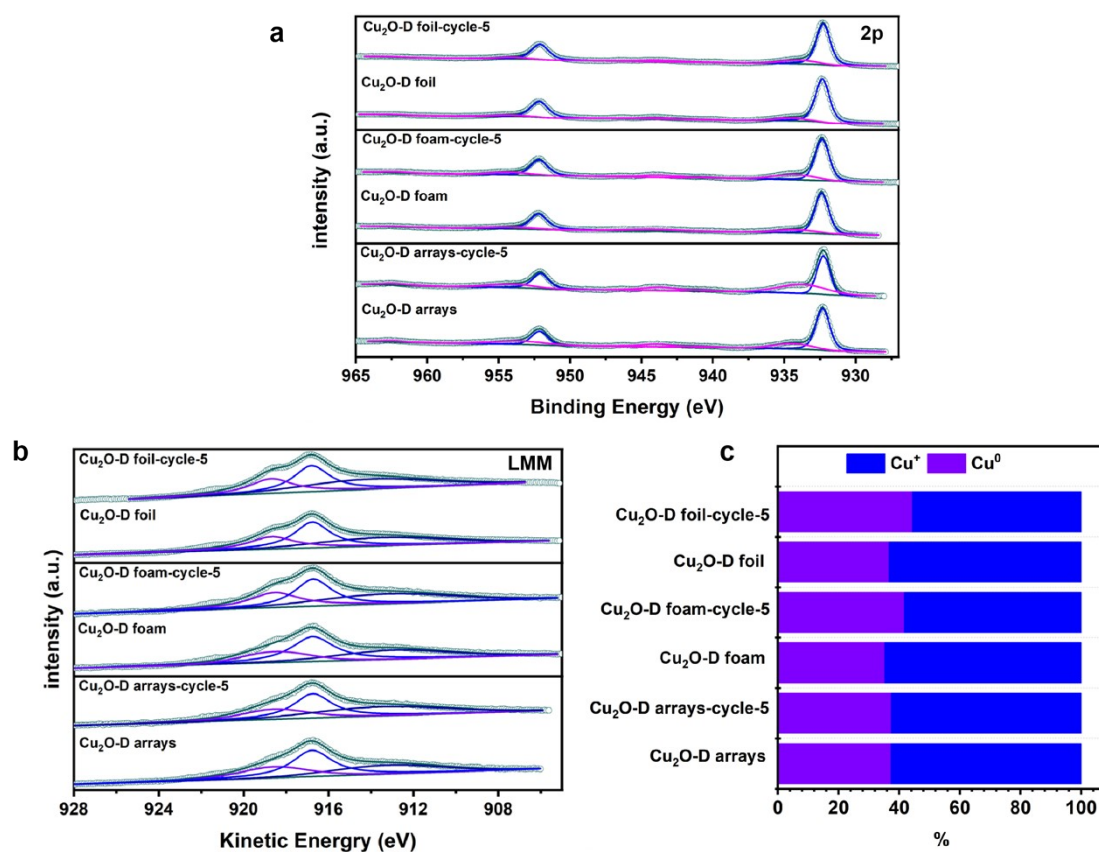

Fig. S7. (a) Cu 2p XPS spectra, (b) Auger Cu LMM and (c) relative percentage of  $\text{Cu}^+$  and  $\text{Cu}^0$  in the  $\text{Cu}_2\text{O}$ -D samples after electrocatalytic reduction of FF for five cycles.

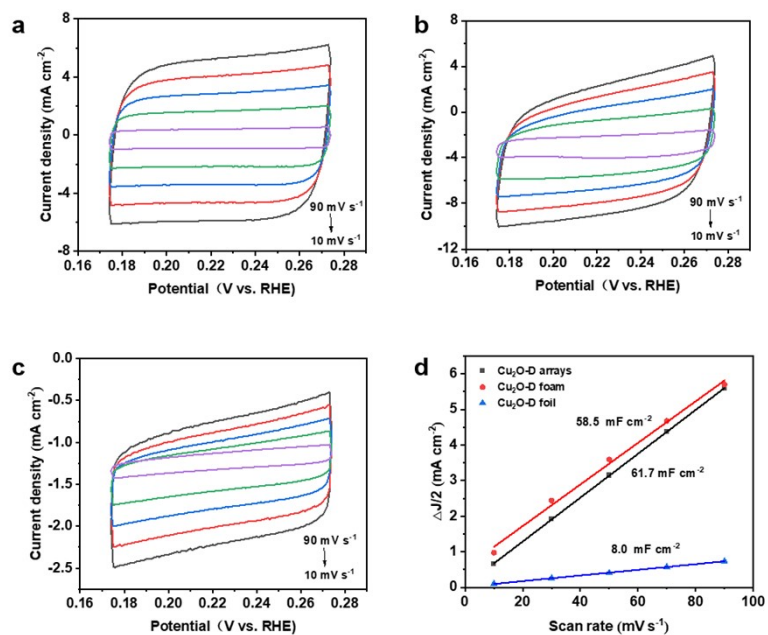

Fig. S8 CV curves of (a) Cu<sub>2</sub>O-D arrays, (b) Cu<sub>2</sub>O-D foam and (c) Cu<sub>2</sub>O-D foil recorded at 0.17-0.27 V<sub>RHE</sub> with sweep rates from 10 to 90 mV s<sup>-1</sup> in pH 14. (d) Capacitive current densities at 0.22 V<sub>RHE</sub> with different sweep rates of the Cu<sub>2</sub>O-D samples.

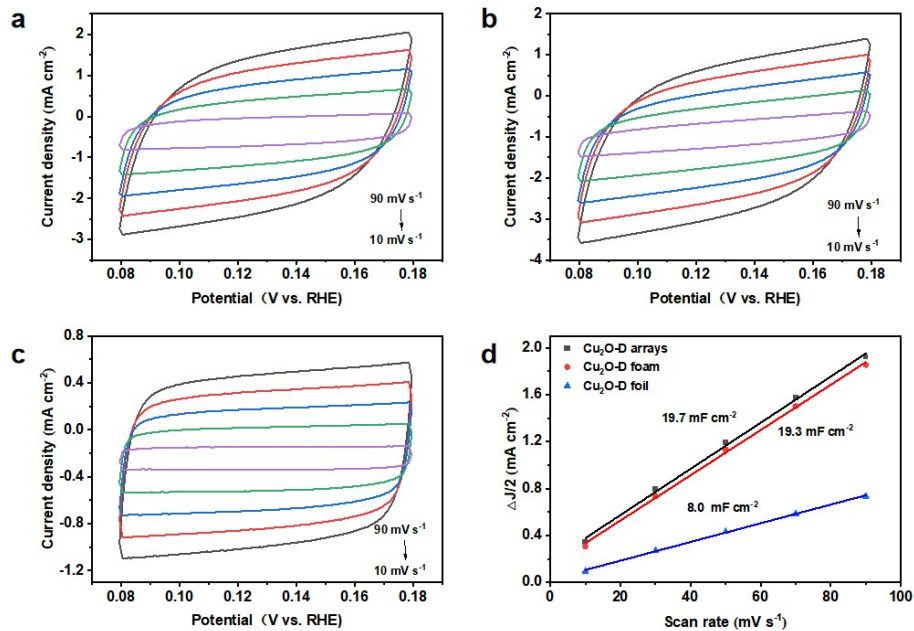

Fig. S9 CV curves of (a) Cu<sub>2</sub>O-D arrays, (b) Cu<sub>2</sub>O-D foam and (c) Cu<sub>2</sub>O-D foil obtained at 0.08-0.18 V<sub>RHE</sub> with sweep rates from 10 to 90 mV s<sup>-1</sup> in pH 9.5. (d) Capacitive current densities at 0.13 V<sub>RHE</sub> with different sweep rates of the Cu<sub>2</sub>O-D samples.

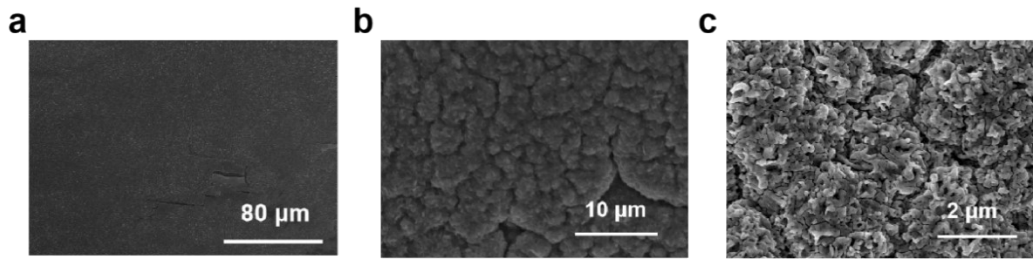

Fig. S10. SEM images of Cu<sub>2</sub>O-D foil.

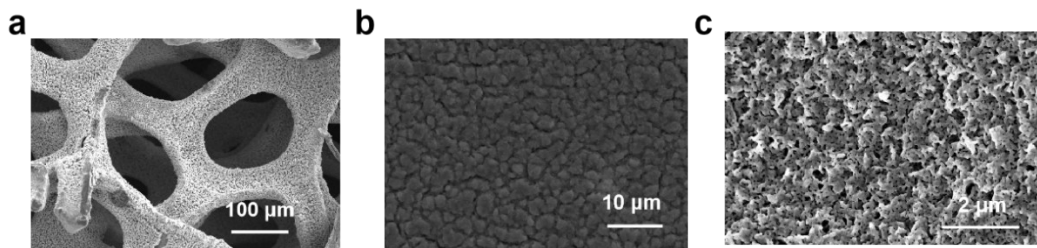

Fig. S11. SEM images of Cu<sub>2</sub>O-D foam.

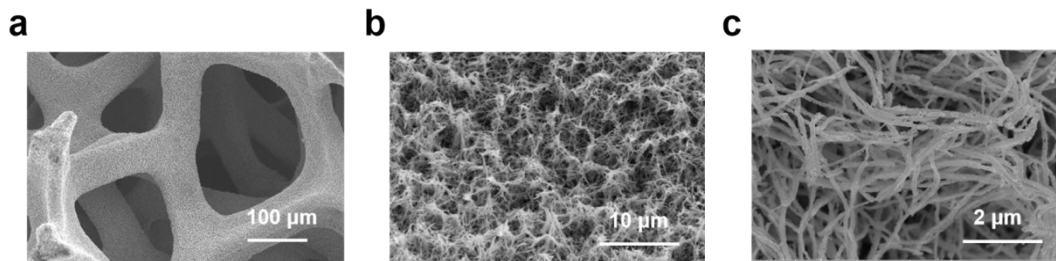

Fig. S12. SEM images of Cu<sub>2</sub>O-D arrays.

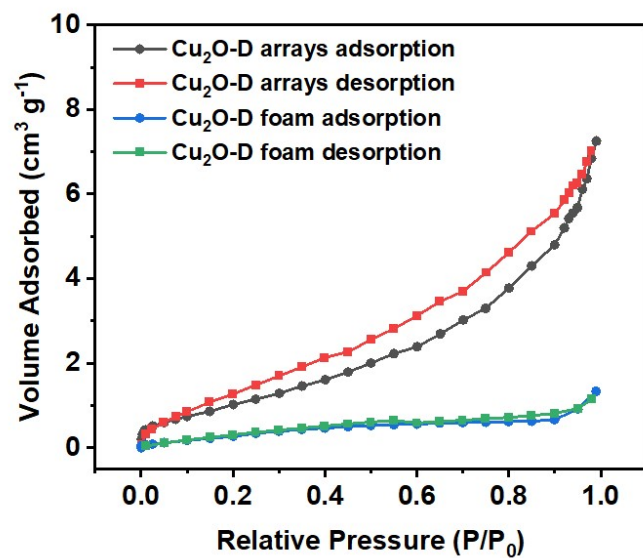

|                                                      | Cu <sub>2</sub> O-D arrays | Cu <sub>2</sub> O-D foam |
|------------------------------------------------------|----------------------------|--------------------------|
| $a_{s,BET}$ [m <sup>2</sup> g <sup>-1</sup> ]        | 3.73                       | 2.54                     |
| Total pore volume [cm <sup>3</sup> g <sup>-1</sup> ] | $8.67 \times 10^{-3}$      | $6.22 \times 10^{-3}$    |

Fig. S13. N<sub>2</sub> adsorption/desorption isotherms of the Cu<sub>2</sub>O-D arrays and Cu<sub>2</sub>O-D foam.

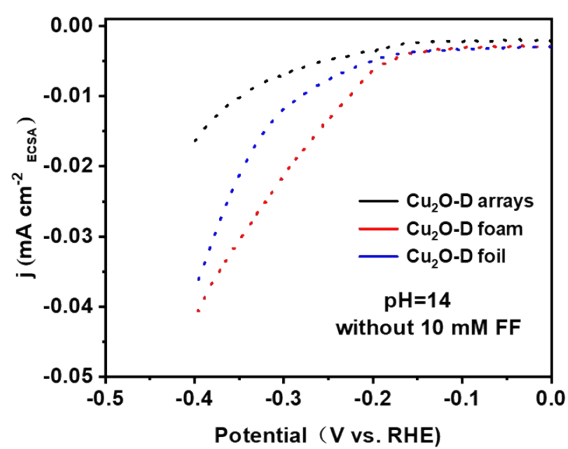

Fig. S14 Current density (in 1.0 M KOH without FF) normalized with ECSA of the Cu<sub>2</sub>O-D arrays, Cu<sub>2</sub>O-D foam and Cu<sub>2</sub>O-D foil.

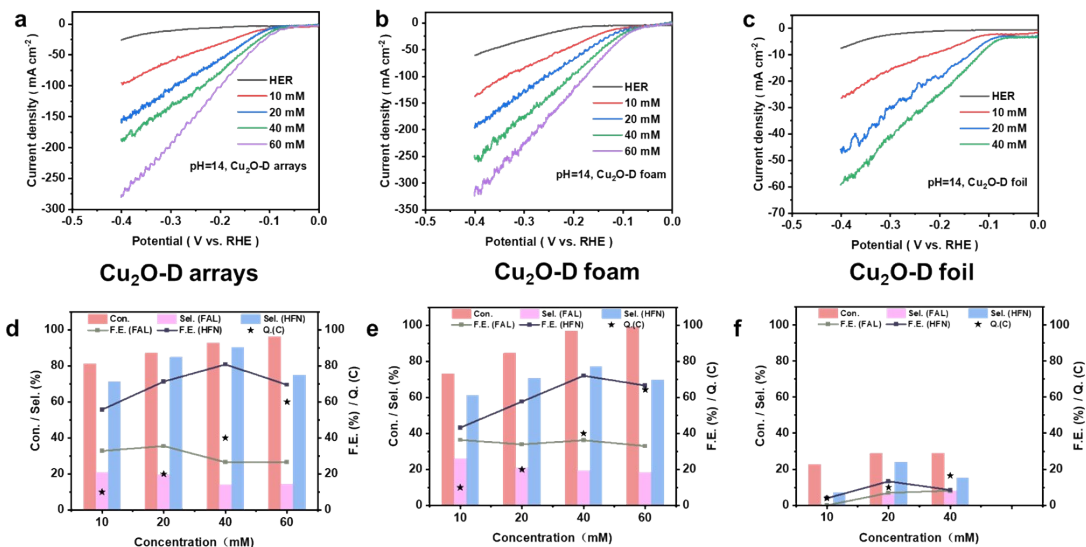

Fig. S15 LSV curves recorded in pH 14 with 10, 20, 40 and 60 mM FF over the (a) Cu<sub>2</sub>O-D arrays, (b) Cu<sub>2</sub>O-D foam and (c) Cu<sub>2</sub>O-D foil. Conversion rate of FF, selectivity and FE to FAL/HFN on (d) Cu<sub>2</sub>O-D arrays, (e) Cu<sub>2</sub>O-D foam and (f) Cu<sub>2</sub>O-D foil in the electrolyte with different FF concentrations.

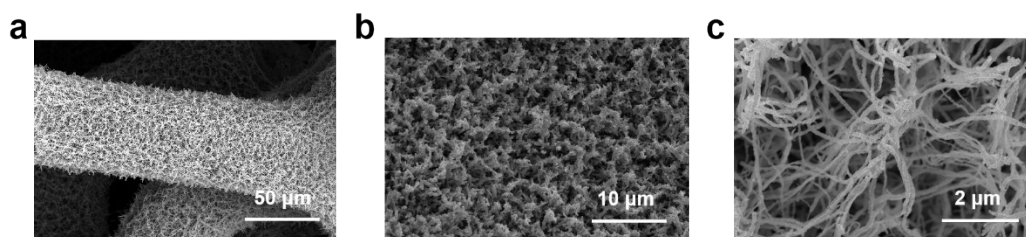

Fig. S16. SEM images of Cu<sub>2</sub>O-D arrays after ten cycles.

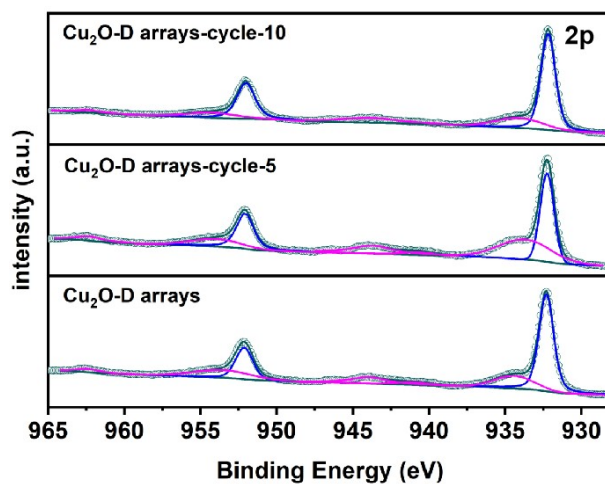

Fig. S17. Cu 2p XPS spectra of the Cu<sub>2</sub>O-D arrays after electrocatalytic reduction of FF for five and ten cycles.

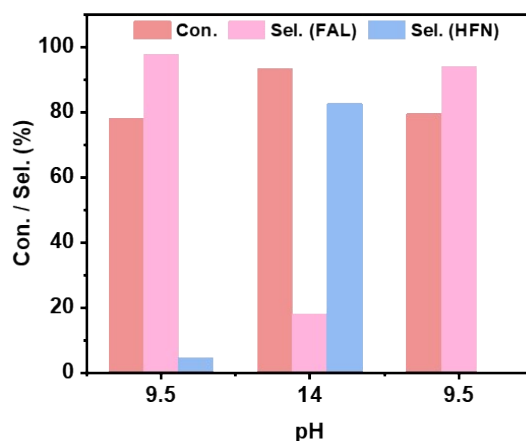

Fig. S18 Conversion rate of FF and selectivity to FAL/HFN on a same Cu<sub>2</sub>O-D arrays electrode for electrochemical reduction of FF in the electrolytes with alternate pH between 9.5 and 14.

Table S1 shows the electrolysis conditions and the relevant parameters of the products.

| pH   | Potential (V vs. RHE) | Con. (FF)% | Sel. (HFN)% | Sel.(FAL)% | C.B.% | Q.(C) |
|------|-----------------------|------------|-------------|------------|-------|-------|
| 14   | -0.176                | 91.7       | 83.5        | 20.2       | 103.4 | 14    |
| 13   | -0.285                | 95.9       | 65.5        | 35.1       | 100.6 | 19.3  |
| 10.8 | -0.313                | 92.2       | 15.4        | 76.6       | 92.7  | 19.3  |
| 9.5  | -0.341                | 72.1       | 0.5         | 98.4       | 99.3  | 19.3  |

Table S2. A comparison of the performance of electrochemical reduction of FF (HFN production) between the Cu<sub>2</sub>O-D arrays and other reported electrocatalysts.

| Catalyst                    | Potential          | pH                                                                                                                                                | Con.          | Sel.(HFN)   | F.E.(HFN) | Ref.      |
|-----------------------------|--------------------|---------------------------------------------------------------------------------------------------------------------------------------------------|---------------|-------------|-----------|-----------|
| Cu <sub>2</sub> O-D arrays  | -0.176 V vs. RHE   | 1M KOH (pH 14)                                                                                                                                    | 91.7%         | 83.5%       | 75.1%     | This work |
| Cu-Sn                       | -0.5 V vs. RHE     | 0.1 M phosphate buffer solution (pH6.8)                                                                                                           | >97%          | >67%        |           | 1         |
| Cu/Co doped phthalocyanines | -0.50 V vs. RHE    | 0.1 M potassium bicarbonate-carbonate buffer (pH 10)                                                                                              |               |             | 65.3%     | 2         |
| 2H-rich MoS <sub>2</sub>    | -1.0 V vs. Ag/AgCl | 0.4 M borate (H <sub>3</sub> BO <sub>3</sub> /Na <sub>2</sub> B <sub>4</sub> O <sub>7</sub> ) buffer in a 1:4 v/v% ratio (methanol:buffer) (pH 9) | 98%           | 42.7%       |           | 3         |
| Cu-NP/Ni/NF                 | -0.45 V vs. RHE    | 0.5 M NaOH, 50 mM FF                                                                                                                              | 73.2 ± 2.3% % | 64.2 ± 3.2% |           | 4         |
| Cu                          | -1.5 V vs. Ag/AgCl | 0.2 M TBABr+MeCN, containing 5 v/v% H <sub>2</sub> O.                                                                                             |               | 51%         | >50%      | 5         |



|              |                    |                   |     |       |     |   |
|--------------|--------------------|-------------------|-----|-------|-----|---|
| Carbon paper | -1.4 V vs. Ag/AgCl | 0.1 M KOH (pH 13) | 66% | ≈100% | 89% | 6 |
|--------------|--------------------|-------------------|-----|-------|-----|---|

**Table S3. A comparison of the performance of electrochemical reduction of FF (FAL production) between the Cu<sub>2</sub>O-D arrays and other reported electrocatalysts.**

| Catalyst                   | Potential          | pH                                                                                                                                                | Con.        | Sel.(FAL)   | F.E.(FAL) | Ref.      |
|----------------------------|--------------------|---------------------------------------------------------------------------------------------------------------------------------------------------|-------------|-------------|-----------|-----------|
| Cu <sub>2</sub> O-D arrays | -0.391 V vs. RHE.  | 0.1 M Na <sub>2</sub> CO <sub>3</sub> -NaHCO <sub>3</sub> buffer solution (pH 9.5)                                                                | 75.4%       | 98.4%       | 74.1%     | This work |
| 15%-Cu/NC900               | -1.3 V vs. Ag/AgCl | 1M KOH (pH 14)                                                                                                                                    | 99%         | 99%         | 95%       | 7         |
| 1T-rich MoS <sub>2</sub>   | -1.2 V vs. Ag/AgCl | 0.4 M borate (H <sub>3</sub> BO <sub>3</sub> /Na <sub>2</sub> B <sub>4</sub> O <sub>7</sub> ) buffer in a 1:4 v/v% ratio (methanol:buffer) (pH 9) | 98%         | 94.4%       |           | 3         |
| Cu-NPNi/NF                 | -0.45 V vs. RHE    | 0.5 M NaOH, 50 mM FF                                                                                                                              | 73.2 ± 2.3% | 21.6 ± 1.1% |           | 4         |
| Cu/Cu-400 nm               | -0.5 V vs. RHE     | 0.5 M H <sub>2</sub> SO <sub>4</sub>                                                                                                              | 28.6 ± 2.8% | 24%         | 20%       | 8         |
| OP-Cu                      | -0.56 V vs. RHE    | 0.25 M phosphate buffer solution (pH 6.8)                                                                                                         |             | 96%         | 91.1%     | 9         |
| Cu <sub>1</sub> /PC        | -0.75 V vs. RHE    | acetate buffer (pH = 5)                                                                                                                           |             |             | 94%       | 10        |
| Ag@Cu NWAs/CF              | -0.51V vs. RHE     | 0.5 M borate buffer (pH=9.2)                                                                                                                      | 99.6%       | 96.6%       | 96.1%     | 11        |
| Cu NWAs/CF                 | -0.51V vs. RHE     | 0.5 M borate buffer (pH=9.2)                                                                                                                      | 88%         | 78%         | 70%       | 11        |

## Notes and references

- X. Liu, Y. Sun, H. Ren, Y. Lin, M. Wu and Z. Li, *ACS Catal.*, 2024, 14, 5817-5826.
- Z. Mukadam, S. Liu, A. Pedersen, J. Barrio, S. Fearn, S. C. Sarma, M.-M. Titirici, S. B. Scott, I. E. L. Stephens, K. Chan and S. Mezzavilla, *Energy Environ. Sci.*, 2023, 16, 2934-2944.
- S. Huang, B. Gong, Y. Jin, P. H. L. Sit and J. C.-H. Lam, *ACS Catal.*, 2022, 12, 11340-11354.
- R. J. Dixit, K. Bhattacharyya, V. K. Ramani and S. Basu, *Green Chem.*, 2021, 23, 4201-4212.
- M. Temnikova, J. Medvedev, X. Medvedeva, N. H. Delva, E. Khairullina, E. Krivoshapkina and A. Klinkova, *ChemElectroChem*, 2022, 10, e202200865.
- X. Shang, Y. Yang and Y. Sun, *Green Chem.*, 2020, 22, 5395-5401.
- W. Xu, C. Yu, J. Chen and Z. Liu, *Appl. Catal. B-Environ.*, 2022, 305, 121062.
- S. Jung, A. N. Karaiskakis and E. J. Biddinger, *Catal. Today*, 2019, 323, 26-34.
- P. Chen, W. Zhang, J. Tan, Y. Yang, Y. Jia, Y. Tang and Q. Gao, *Catalysis Science & Technology*, 2022, 12, 4032-4039.
- P. Zhou, Y. Chen, P. Luan, X. Zhang, Z. Yuan, S.-X. Guo, Q. Gu, B. Johannessen, M. Mollah, A. L. Chaffee, D. R. Turner and J. Zhang, *Green Chem.*, 2021, 23, 3028-3038.
- Y. Zhong, R. Ren, Y. Peng, J. Wang, X. Ren, Q. Li and Y. Fan, *Mol. Catal.*, 2022, 528, 112487.
